# Supplementary material for: Studies on the chemical reduction of polynuclear titanium(iv) nitrido complexes
Source: Royal Society of Chemistry journal article supplement (doi:10.1039/d3dt04241c), 2024-01-01
Supplement: d3dt04241c1.pdf [file d3dt04241c1.pdf]

## Electronic Supplementary Information for:

### Studies on the chemical reduction of polynuclear titanium(IV) nitrido complexes

Jorge Caballo, Adrián Calvo-Molina, Sergio Claramonte, Maider Greño, Adrián Pérez-  
Redondo and Carlos Yélamos\*

Departamento de Química Orgánica y Química Inorgánica, Instituto de Investigación  
Química “Andrés M. del Río” (IQAR), Universidad de Alcalá, 28805 Alcalá de Henares-  
Madrid (Spain). E-mail: carlos.yelamos@uah.es

#### Contents:

- Cyclic voltammograms of complexes **1**, **3**, **4**, and **14**.
- Experimental crystallographic data of complexes **5**, **11**, **13**, and **17**.
- Perspective view of the crystal structure of compounds **5**, **11**, and **13**.
- Table for selected lengths and angles of the crystal structures of **5**, **11**, **13**, and **17**.
- EPR spectra for complex **7**.
- Selected  $^1\text{H}$  and  $^{13}\text{C}\{^1\text{H}\}$  NMR spectra.

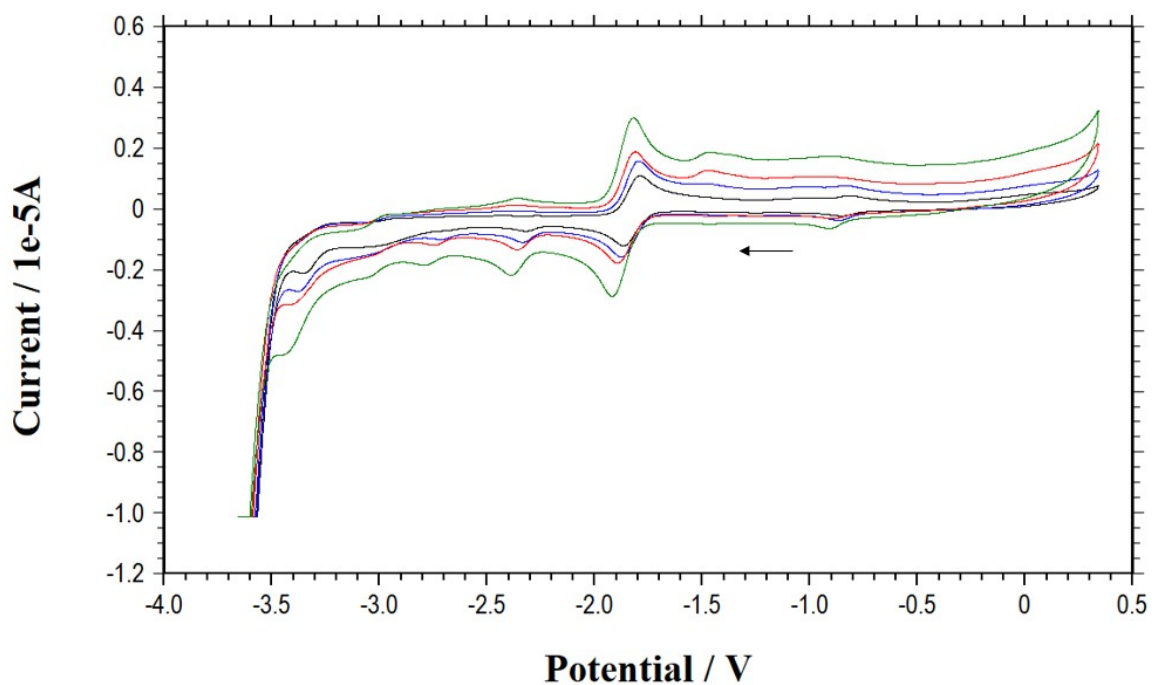

**Figure S1.** Cyclic voltammograms of  $[Ti_4(\eta^5-C_5Me_5)_4](\mu_3-N)_4$  (**1**) in thf/0.1 M  $[N(nBu)_4][PF_6]$  versus  $Fc^+/Fc$  at 22 °C at 50 (black line), 100 (blue line), 200 (red line) and 500 (green line)  $mV s^{-1}$  scan rate.

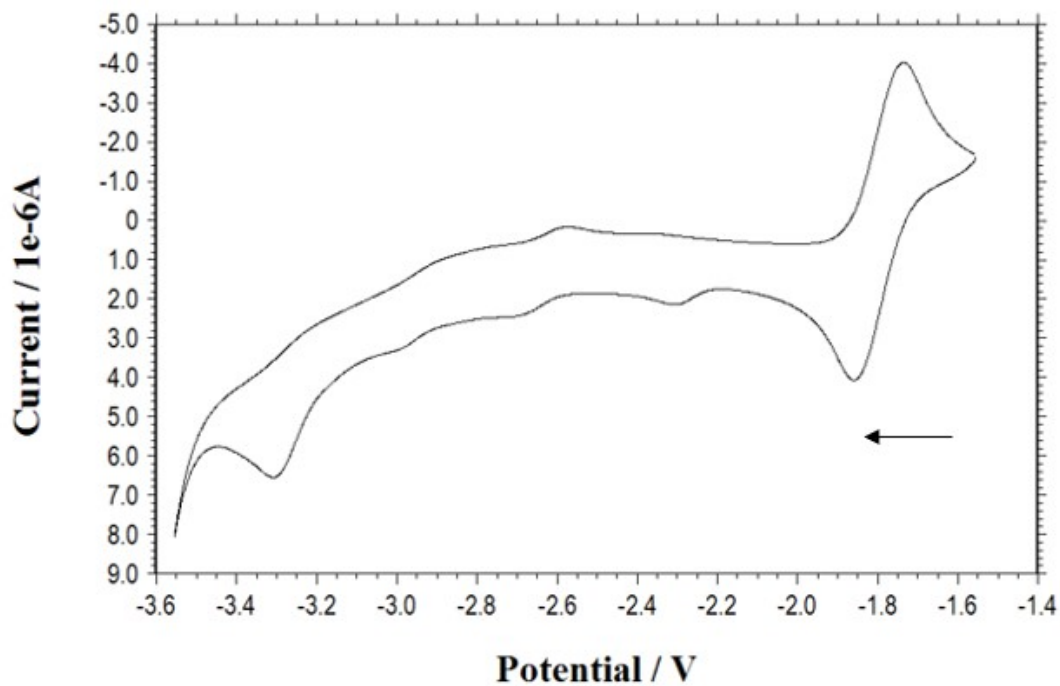

**Figure S2.** Cyclic voltammogram of  $[Ti_4(\eta^5-C_5Me_5)_3(\eta^5-C_5H_4SiMe_3)](\mu_3-N)_4$  (**3**) in thf/0.1 M  $[N(nBu)_4][PF_6]$  versus  $Fc^+/Fc$  at 50  $mV s^{-1}$  scan rate at 22 °C.

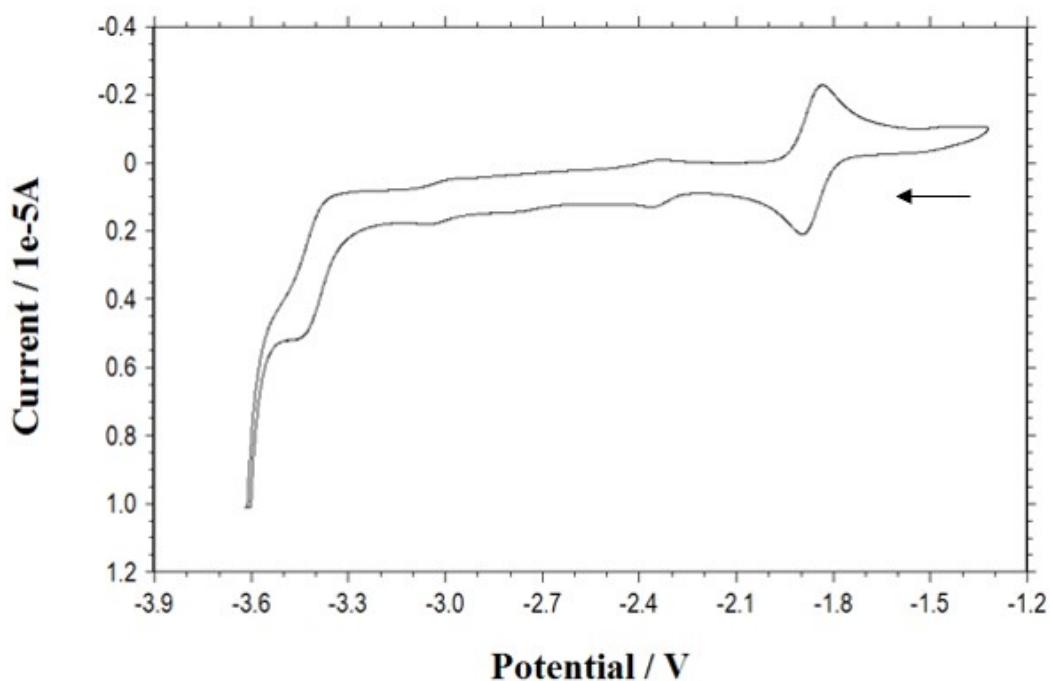

**Figure S3.** Cyclic voltammogram of [ $\{\text{Ti}_4(\eta^5\text{-C}_5\text{Me}_5)_3(\eta^5\text{-C}_5\text{H}_5)\}(\mu_3\text{-N})_4$ ] (**4**) in thf/0.1 M  $[\text{N}(\text{nBu})_4][\text{PF}_6]$  versus  $\text{Fc}^+/\text{Fc}$  at  $50 \text{ mV s}^{-1}$  scan rate at  $22 \text{ }^\circ\text{C}$ .

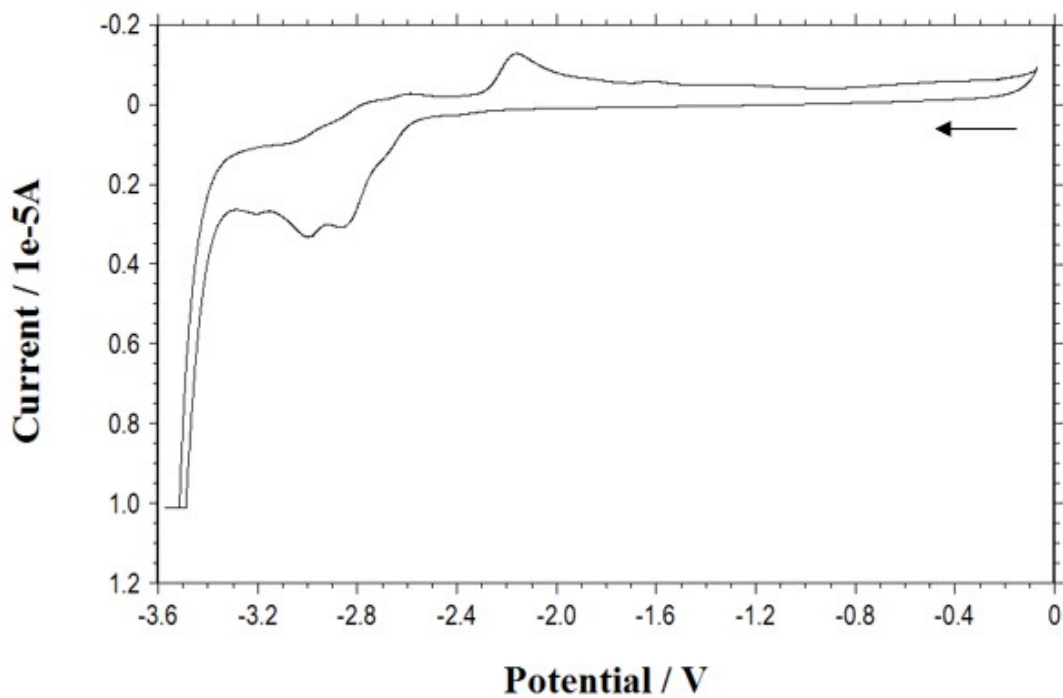

**Figure S4.** Cyclic voltammogram of [ $\{\text{Ti}(\eta^5\text{-C}_5\text{Me}_5)(\mu\text{-NH})\}_3(\mu_3\text{-N})$ ] (**14**) in thf/0.1 M  $[\text{N}(\text{nBu})_4][\text{PF}_6]$  versus  $\text{Fc}^+/\text{Fc}$  at  $50 \text{ mV s}^{-1}$  scan rate at  $22 \text{ }^\circ\text{C}$ .

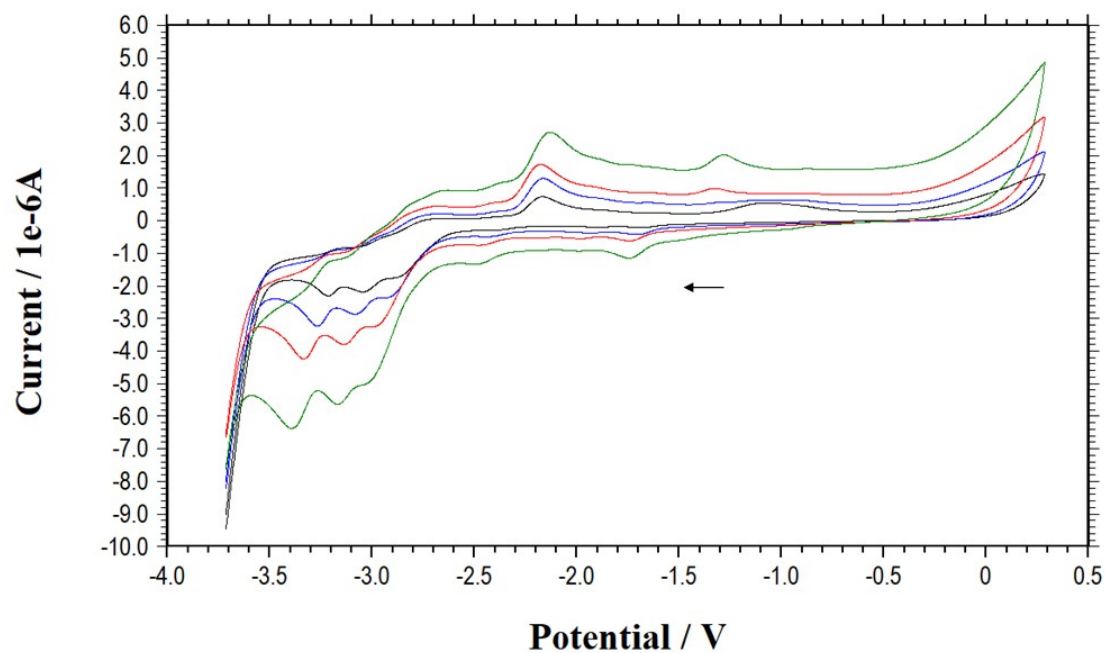

**Figure S5.** Cyclic voltammograms of [ $\{\text{Ti}(\eta^5\text{-C}_5\text{Me}_5)(\mu\text{-NH})\}_3(\mu_3\text{-N})$ ] (**14**) in thf/0.1 M  $[\text{N}(\text{nBu})_4][\text{PF}_6]$  versus  $\text{Fc}^+/\text{Fc}$  at 22 °C at 50 (black line), 100 (blue line), 200 (red line) and 500 (green line)  $\text{mV s}^{-1}$  scan rate.

**Table S1.** Experimental Data for the X-ray Diffraction Studies on **5**, **11**, **13**, and **17**.

|                                                                | <b>5</b>                                                                         | <b>11</b> ·C <sub>6</sub> H <sub>6</sub>                                          | <b>13</b> ·2C <sub>7</sub> H <sub>8</sub>                                                      | <b>17</b>                                                                      |
|----------------------------------------------------------------|----------------------------------------------------------------------------------|-----------------------------------------------------------------------------------|------------------------------------------------------------------------------------------------|--------------------------------------------------------------------------------|
| Formula                                                        | C <sub>64</sub> H <sub>108</sub> N <sub>4</sub> NaO <sub>6</sub> Ti <sub>4</sub> | C <sub>62</sub> H <sub>100</sub> KN <sub>6</sub> O <sub>6</sub> SiTi <sub>4</sub> | C <sub>78</sub> H <sub>119</sub> K <sub>2</sub> N <sub>4</sub> O <sub>12</sub> Ti <sub>4</sub> | C <sub>50</sub> H <sub>71</sub> KN <sub>4</sub> O <sub>6</sub> Ti <sub>3</sub> |
| <i>M<sub>r</sub></i>                                           | 1244.13                                                                          | 1284.26                                                                           | 1574.56                                                                                        | 1006.9                                                                         |
| <i>T</i> [K]                                                   | 150(2)                                                                           | 150(2)                                                                            | 200(2)                                                                                         | 150(2)                                                                         |
| <i>λ</i> [Å]                                                   | 0.71073                                                                          | 0.71073                                                                           | 0.71073                                                                                        | 0.71073                                                                        |
| crystal system                                                 | Cubic                                                                            | Orthorhombic                                                                      | Triclinic                                                                                      | Monoclinic                                                                     |
| space group                                                    | <i>I</i> <sub>2</sub> 3                                                          | <i>P</i> 2 <sub>1</sub> 2 <sub>1</sub> 2                                          | <i>P</i> -1                                                                                    | <i>P</i> 2 <sub>1</sub> / <i>c</i>                                             |
| <i>a</i> [Å]; <i>α</i> [°]                                     | 23.803(5)                                                                        | 23.739(3)                                                                         | 11.661(1); 85.26(1)                                                                            | 18.208(1)                                                                      |
| <i>b</i> [Å]; <i>β</i> [°]                                     |                                                                                  | 33.351(3)                                                                         | 18.772(1); 78.97(1)                                                                            | 12.389(2); 102.42(1)                                                           |
| <i>c</i> [Å]; <i>γ</i> [°]                                     |                                                                                  | 16.799(3)                                                                         | 20.043(2); 81.01(1)                                                                            | 22.664(2)                                                                      |
| <i>V</i> [Å <sup>3</sup> ]                                     | 13487(9)                                                                         | 13300(3)                                                                          | 4247.0(6)                                                                                      | 4992.9(9)                                                                      |
| <i>Z</i>                                                       | 8                                                                                | 8                                                                                 | 2                                                                                              | 4                                                                              |
| <i>ρ</i> <sub>calcd</sub> [g cm <sup>-3</sup> ]                | 1.225                                                                            | 1.283                                                                             | 1.231                                                                                          | 1.340                                                                          |
| <i>μ</i> <sub>MoKα</sub> [mm <sup>-1</sup> ]                   | 0.512                                                                            | 0.595                                                                             | 0.517                                                                                          | 0.603                                                                          |
| <i>F</i> (000)                                                 | 5336                                                                             | 5464                                                                              | 1674                                                                                           | 2128                                                                           |
| crystal size [mm <sup>3</sup> ]                                | 0.27 × 0.24 × 0.19                                                               | 0.18 × 0.17 × 0.16                                                                | 0.40 × 0.27 × 0.14                                                                             | 0.37 × 0.35 × 0.35                                                             |
| <i>θ</i> range [deg]                                           | 2.71 to 27.58                                                                    | 3.03 to 23.30                                                                     | 3.04 to 25.24                                                                                  | 3.09 to 27.50                                                                  |
| index ranges                                                   | -30 to 31,<br>-31 to 31,<br>-31 to 31                                            | -26 to 26,<br>-28 to 37,<br>-18 to 18                                             | -13 to 13,<br>-22 to 22,<br>-24 to 24                                                          | -23 to 23,<br>-16 to 16,<br>-29 to 29                                          |
| Reflections collected                                          | 208791                                                                           | 111322                                                                            | 79483                                                                                          | 92796                                                                          |
| Unique data                                                    | 5225 [R(int) =<br>0.101]                                                         | 19134 [R(int) =<br>0.080]                                                         | 15316 [R(int) =<br>0.100]                                                                      | 11448 [R(int) =<br>0.103]                                                      |
| obsd data [ <i>I</i> >2σ( <i>I</i> )]                          | 4592                                                                             | 13416                                                                             | 10174                                                                                          | 7266                                                                           |
| Goodness-of-fit on <i>F</i> <sup>2</sup>                       | 1.088                                                                            | 1.016                                                                             | 1.057                                                                                          | 1.097                                                                          |
| final <i>R<sup>a</sup></i> indices [ <i>I</i> >2σ( <i>I</i> )] | R1 = 0.045,<br>wR2 = 0.097                                                       | R1 = 0.057,<br>wR2 = 0.106                                                        | R1 = 0.062,<br>wR2 = 0.145                                                                     | R1 = 0.055,<br>wR2 = 0.101                                                     |
| <i>R<sup>a</sup></i> indices (all data)                        | R1 = 0.058,<br>wR2 = 0.108                                                       | R1 = 0.098,<br>wR2 = 0.118                                                        | R1 = 0.102,<br>wR2 = 0.175                                                                     | R1 = 0.117,<br>wR2 = 0.130                                                     |
| largest diff. peak/hole [e Å <sup>-3</sup> ]                   | 0.614 and -0.328                                                                 | 0.387 and -0.300                                                                  | 0.528 and -0.466                                                                               | 0.519 and -0.428                                                               |

$$^a R1 = \frac{\sum ||F_o| - |F_c||}{\sum |F_o|}$$

$$wR2 = \left\{ \frac{\sum w(F_o^2 - F_c^2)^2}{\sum w(F_o^2)^2} \right\}^{1/2}$$

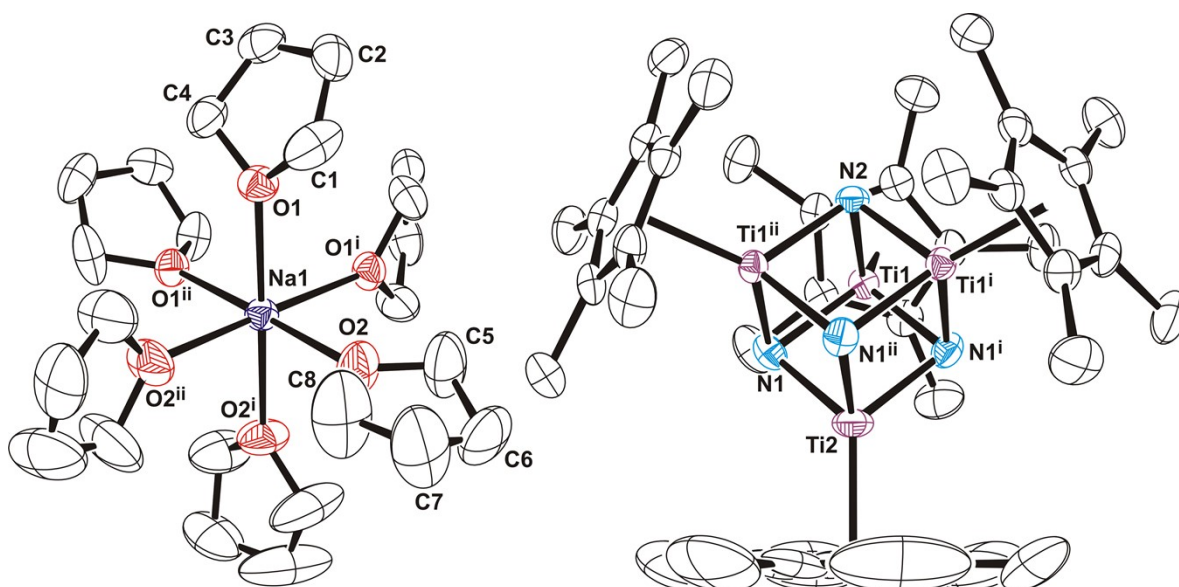

**Figure S6.** Perspective view of **5** with thermal ellipsoids at the 50% probability level. Hydrogen atoms are omitted for clarity. Symmetry code: (i)  $z, x, y$ ; (ii)  $y, z, x$ .

**Table S2.** Selected Lengths (Å) and Angles (deg) for **5**.

|                                |          |                                |          |
|--------------------------------|----------|--------------------------------|----------|
| Ti(1)–N(1)                     | 1.954(3) | Ti(1)–N(2)                     | 1.948(3) |
| Ti(1)–N(1) <sup>i</sup>        | 1.957(3) | Ti(2)–N(1)                     | 1.951(3) |
| Ti(1)–Ti(2)                    | 2.797(1) | Ti(1)–Ti(1) <sup>i</sup>       | 2.789(1) |
| Ti(1)–Ti(1) <sup>ii</sup>      | 2.789(1) | Na(1)–O(1)                     | 2.395(4) |
| Na(1)–O(2)                     | 2.360(4) |                                |          |
| N(1)–Ti(1)–N(2)                | 88.8(1)  | N(1)–Ti(1)–N(1) <sup>i</sup>   | 88.4(2)  |
| N(2)–Ti(1)–N(1) <sup>i</sup>   | 88.7(1)  | N(1)–Ti(2)–N(1) <sup>i</sup>   | 88.7(1)  |
| Ti(1)–N(1)–Ti(2)               | 91.5(1)  | Ti(1)–N(1)–Ti(1) <sup>ii</sup> | 91.0(1)  |
| Ti(2)–N(1)–Ti(1) <sup>ii</sup> | 91.4(1)  | Ti(1)–N(2)–Ti(1) <sup>i</sup>  | 91.4(2)  |
| O(1)–Na(1)–O(2)                | 90.5(1)  | O(1)–Na(1)–O(1) <sup>i</sup>   | 90.9(1)  |
| O(1)–Na(1)–O(2) <sup>i</sup>   | 178.6(2) | O(1)–Na(1)–O(2) <sup>ii</sup>  | 89.5(1)  |
| O(2)–Na(1)–O(2) <sup>i</sup>   | 89.1(2)  |                                |          |

Symmetry code: (i)  $z, x, y$ ; (ii)  $y, z, x$ .

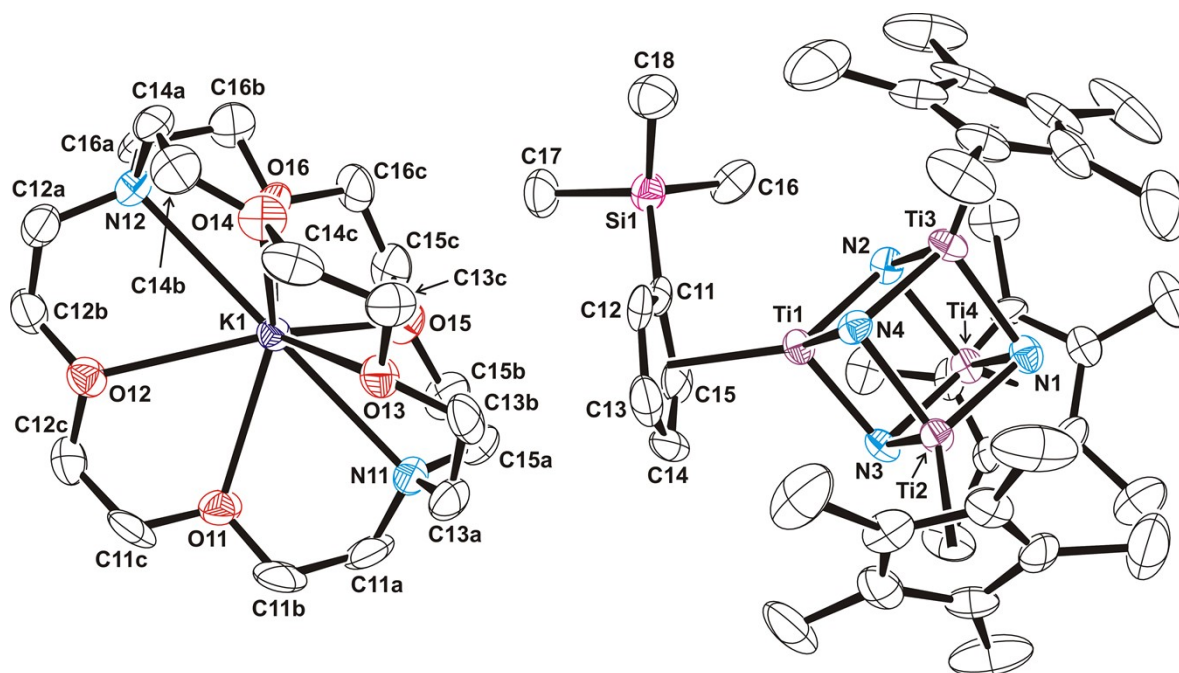

**Figure S7.** Perspective view of one independent ion pair of  $11 \cdot C_6D_6$  with thermal ellipsoids at the 50% probability level. Hydrogen atoms and the benzene solvent molecule are omitted for clarity.

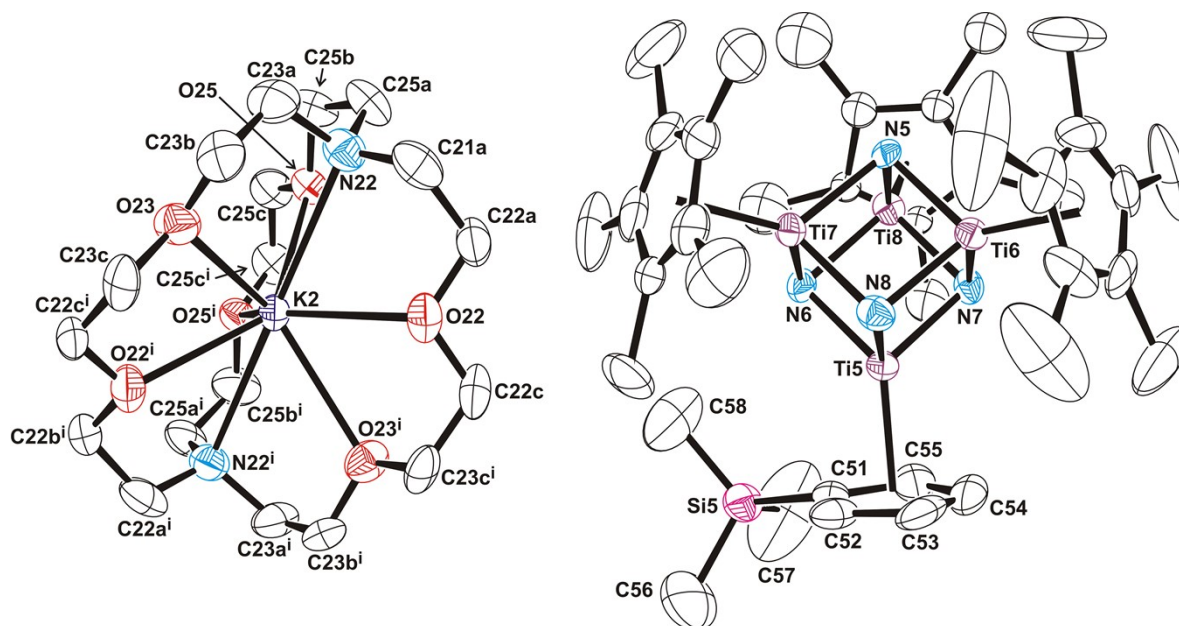

**Figure S8.** Perspective view of the second independent ion pair of  $11 \cdot C_6D_6$  with thermal ellipsoids at the 50% probability level. Hydrogen atoms are omitted for clarity. Symmetry code: (i)  $2 - x, 1 - y, z$ .

**Table S3.** Selected Lengths (Å) and Angles (deg) for **11·C<sub>6</sub>D<sub>6</sub>**.

|               |                   |               |                   |
|---------------|-------------------|---------------|-------------------|
| Ti(1)–N(2)    | 1.926(6)          | Ti(5)–N(6)    | 1.913(6)          |
| Ti(1)–N(3)    | 1.939(6)          | Ti(5)–N(7)    | 1.923(6)          |
| Ti(1)–N(4)    | 1.945(6)          | Ti(5)–N(8)    | 1.919(6)          |
| Ti(2)–N(1)    | 1.910(6)          | Ti(6)–N(5)    | 1.922(6)          |
| Ti(2)–N(3)    | 1.929(6)          | Ti(6)–N(7)    | 1.928(6)          |
| Ti(2)–N(4)    | 1.953(6)          | Ti(6)–N(8)    | 1.940(6)          |
| Ti(3)–N(1)    | 1.962(6)          | Ti(7)–N(5)    | 1.959(5)          |
| Ti(3)–N(2)    | 1.932(6)          | Ti(7)–N(6)    | 1.935(6)          |
| Ti(3)–N(4)    | 1.937(6)          | Ti(7)–N(8)    | 1.923(6)          |
| Ti(4)–N(1)    | 1.943(6)          | Ti(8)–N(5)    | 1.927(6)          |
| Ti(4)–N(2)    | 1.966(6)          | Ti(8)–N(6)    | 1.948(6)          |
| Ti(4)–N(3)    | 1.904(6)          | Ti(8)–N(7)    | 1.913(6)          |
| Ti(1)–Ti(2)   | 2.752(2)          | Ti(5)–Ti(6)   | 2.754(2)          |
| Ti(1)–Ti(3)   | 2.785(2)          | Ti(5)–Ti(7)   | 2.772(2)          |
| Ti(1)–Ti(4)   | 2.764(2)          | Ti(5)–Ti(8)   | 2.769(2)          |
| Ti(2)–Ti(3)   | 2.764(2)          | Ti(6)–Ti(7)   | 2.764(2)          |
| Ti(2)–Ti(4)   | 2.781(2)          | Ti(6)–Ti(8)   | 2.763(2)          |
| Ti(3)–Ti(4)   | 2.758(2)          | Ti(7)–Ti(8)   | 2.756(2)          |
| K(1)–O        | 2.785(5)–2.855(5) | K(2)–O        | 2.806(6)–2.840(5) |
| K(1)–N        | 3.004(7)–3.030(6) | K(2)–N(22)    | 3.015(7)          |
| N–Ti(1)–N av  | 88.8(9)           | N–Ti(5)–N av  | 88.5(5)           |
| N–Ti–N av     | 89(1)             | N–Ti–N av     | 88.5(8)           |
| Ti–N(1)–Ti av | 91(1)             | Ti–N(5)–Ti av | 91.0(8)           |
| Ti–N–Ti av    | 91(1)             | Ti–N–Ti av    | 91.6(7)           |
| O–K(1)–O      | 59.4(2)–139.2(2)  | O–K(2)–O      | 58.2(2)–137.4(2)  |
| O–K(1)–N      | 59.6(2)–120.5(2)  | O–K(2)–N      | 60.1(2)–120.1(2)  |
| N–K(1)–N      | 179.4(2)          | N–K(2)–N      | 179.8(3)          |



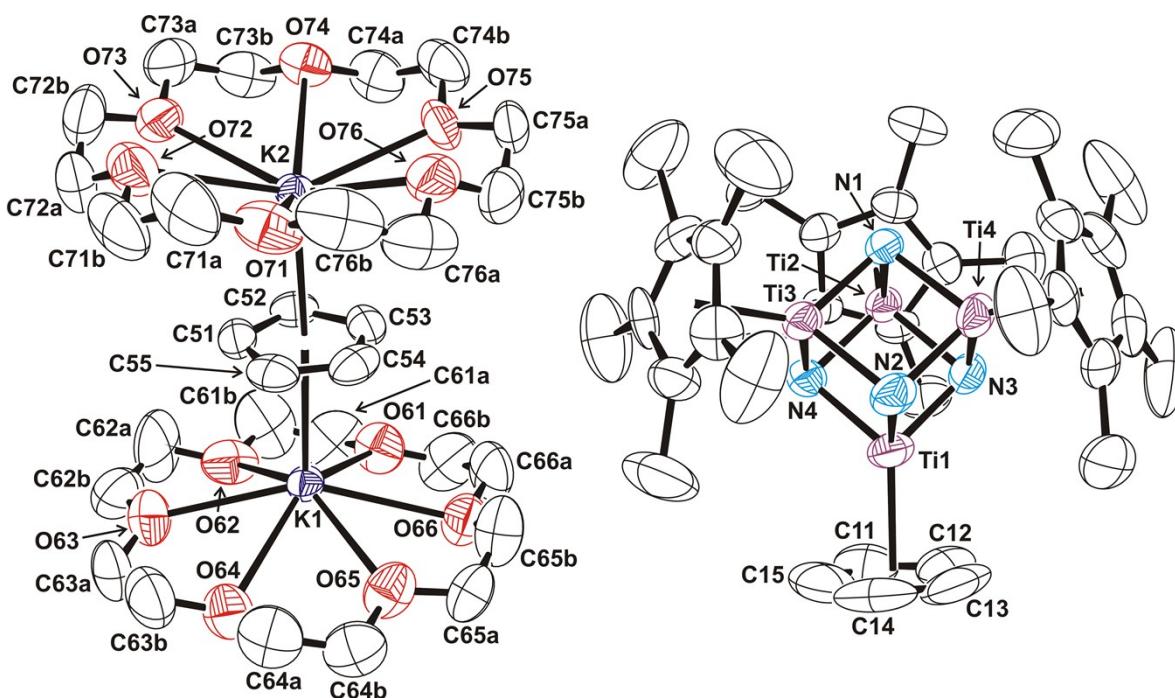

**Figure S9.** Perspective view of  $13 \cdot 2C_7H_8$  with thermal ellipsoids at the 50% probability level. Hydrogen atoms are omitted for clarity.

**Table S4.** Selected Lengths (Å) and Angles (deg) for  $13 \cdot 2C_7H_8$ .

|               |                   |              |                   |
|---------------|-------------------|--------------|-------------------|
| Ti(1)–N(2)    | 1.932(4)          | Ti(1)–N(3)   | 1.926(4)          |
| Ti(1)–N(4)    | 1.926(3)          | Ti(2)–N(1)   | 1.941(3)          |
| Ti(2)–N(3)    | 1.937(3)          | Ti(2)–N(4)   | 1.941(3)          |
| Ti(3)–N(1)    | 1.928(3)          | Ti(3)–N(2)   | 1.940(3)          |
| Ti(3)–N(4)    | 1.933(3)          | Ti(4)–N(1)   | 1.944(3)          |
| Ti(4)–N(2)    | 1.938(4)          | Ti(4)–N(3)   | 1.935(3)          |
| Ti(1)–Ti(2)   | 2.771(1)          | Ti(1)–Ti(3)  | 2.769(1)          |
| Ti(1)–Ti(4)   | 2.769(1)          | Ti(2)–Ti(3)  | 2.777(1)          |
| Ti(2)–Ti(4)   | 2.764(1)          | Ti(3)–Ti(4)  | 2.770(1)          |
| K(1)–O        | 2.813(4)–2.957(4) | K(2)–O       | 2.62(2)–3.05(2)   |
| K(1)–C(ring)  | 3.058(4)–3.122(4) | K(2)–C(ring) | 3.057(4)–3.111(4) |
| K(1)–Ct       | 2.856             | K(2)–Ct      | 2.846             |
| N–Ti(1)–N av  | 88.7(1)           | N–Ti–N av    | 88.5(4)           |
| Ti–N(1)–Ti av | 91.2(5)           | Ti–N–Ti av   | 91.5(2)           |
| O–K(1)–O      | 56.9(1)–150.6(1)  | O–K(2)–O     | 55.8(2)–148.5(1)  |
| K(1)–Ct–K(2)  | 176.9             |              |                   |

Ct = centroid of the C(51)–C(55) ring.

**Table S5.** Selected Lengths (Å) and Angles (deg) for **17**.

|                   |          |                   |          |
|-------------------|----------|-------------------|----------|
| K(1)–N(12)        | 2.904(3) | K(1)–N(13)        | 3.034(3) |
| K(1)–N(23)        | 2.999(3) | K(1)–O(41)        | 3.085(3) |
| K(1)–O(42)        | 2.940(2) | K(1)–O(44)        | 2.960(2) |
| K(1)–O(45)        | 2.862(2) | K(1)–O(46)        | 2.936(3) |
| K(1)···O(43)      | 3.407(3) | Ti(1)–N(12)       | 1.918(3) |
| Ti(1)–N(13)       | 1.886(3) | Ti(2)–N(12)       | 1.909(3) |
| Ti(2)–N(23)       | 1.934(3) | Ti(3)–N(13)       | 1.882(3) |
| Ti(3)–N(23)       | 1.941(3) | Ti(1)–N(1)        | 1.951(3) |
| Ti(2)–N(1)        | 1.922(3) | Ti(3)–N(1)        | 1.927(3) |
| K(1)···Ti(1)      | 3.657(1) | K(1)···Ti(2)      | 3.691(1) |
| K(1)···Ti(3)      | 3.762(1) | Ti(1)···Ti(2)     | 2.787(1) |
| Ti(1)···Ti(3)     | 2.768(1) | Ti(2)···Ti(3)     | 2.800(1) |
| N(12)–K(1)–N(13)  | 61.1(1)  | N(12)–K(1)–N(23)  | 61.2(1)  |
| N(13)–K(1)–N(23)  | 59.8(1)  | O(41)–K(1)–O(42)  | 56.2(1)  |
| O(41)–K(1)–O(44)  | 117.6(1) | O(41)–K(1)–O(45)  | 98.5(1)  |
| O(41)–K(1)–O(46)  | 50.2(1)  | O(42)–K(1)–O(44)  | 98.0(1)  |
| O(42)–K(1)–O(45)  | 133.6(1) | O(42)–K(1)–O(46)  | 106.1(1) |
| O(44)–K(1)–O(45)  | 56.9(1)  | O(44)–K(1)–O(46)  | 109.0(1) |
| O(45)–K(1)–O(46)  | 58.4(1)  | N(12)–K(1)–O(41)  | 96.6(1)  |
| N(12)–K(1)–O(42)  | 80.9(1)  | N(12)–K(1)–O(44)  | 138.1(1) |
| N(12)–K(1)–O(45)  | 144.6(1) | N(12)–K(1)–O(46)  | 111.4(1) |
| N(13)–K(1)–O(41)  | 113.5(1) | N(13)–K(1)–O(42)  | 140.0(1) |
| N(13)–K(1)–O(44)  | 118.0(1) | N(13)–K(1)–O(45)  | 83.6(1)  |
| N(13)–K(1)–O(46)  | 79.3(1)  | N(23)–K(1)–O(41)  | 157.6(1) |
| N(23)–K(1)–O(42)  | 113.4(1) | N(23)–K(1)–O(44)  | 81.9(1)  |
| N(23)–K(1)–O(45)  | 101.6(1) | N(23)–K(1)–O(46)  | 137.1(1) |
| N(12)–Ti(1)–N(13) | 105.0(1) | N(12)–Ti(2)–N(23) | 102.9(1) |
| N(13)–Ti(3)–N(23) | 103.8(1) | N(1)–Ti(1)–N(12)  | 86.4(1)  |
| N(1)–Ti(1)–N(13)  | 86.5(1)  | N(1)–Ti(2)–N(12)  | 87.4(1)  |
| N(1)–Ti(2)–N(23)  | 87.0(1)  | N(1)–Ti(3)–N(13)  | 87.3(1)  |
| N(1)–Ti(3)–N(23)  | 86.6(1)  | K(1)–N(12)–Ti(1)  | 96.5(1)  |
| K(1)–N(12)–Ti(2)  | 98.0(1)  | Ti(1)–N(12)–Ti(2) | 93.5(1)  |
| K(1)–N(13)–Ti(1)  | 93.1(1)  | K(1)–N(13)–Ti(3)  | 97.1(1)  |
| Ti(1)–N(13)–Ti(3) | 94.5(1)  | K(1)–N(23)–Ti(2)  | 94.4(1)  |
| K(1)–N(23)–Ti(3)  | 96.8(1)  | Ti(2)–N(23)–Ti(3) | 92.5(1)  |
| Ti(1)–N(1)–Ti(2)  | 92.0(1)  | Ti(1)–N(1)–Ti(3)  | 91.1(1)  |
| Ti(2)–N(1)–Ti(3)  | 93.3(1)  |                   |          |

## EPR spectroscopy

A 5 mM frozen pyridine solution of compound **7** was registered in a Bruker Magnettech ESR5000 spectrometer.

### Experimental parameters:

Temperature = 93 K; MW power = 2.51 mW; modulation frequency = 100 kHz; modulation = 0.05 mT.

**Simulation parameters** were performed using the EasySpin toolbox in Matlab (S. Stoll and A. Schweiger, *J. Magn. Reson.* 2006, **178**, 42–55):

Compound **7**:  $g = [1.996]$ ;  $lwpp = [1,963 \ 1,697]$

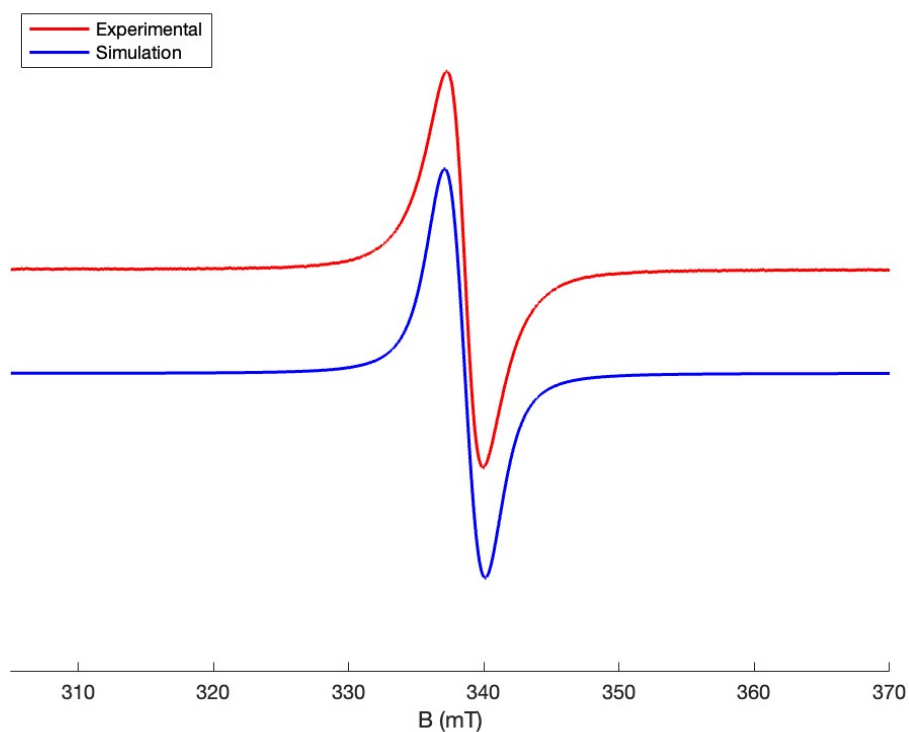

**Figure S10.** Low-temperature (93 K) EPR spectra of **7** ( $g = 1.996$ ).

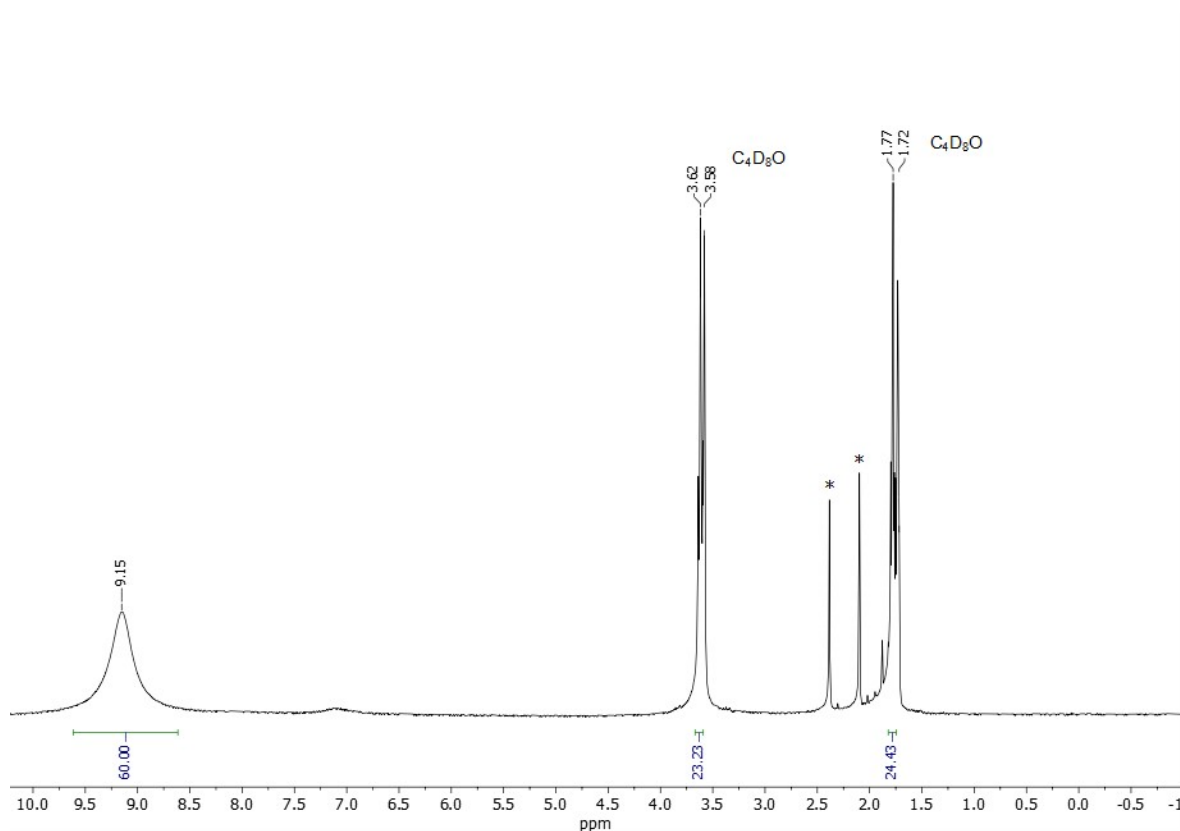

**Figure S11.**  $^1\text{H}$  NMR spectrum (300 MHz,  $\text{C}_4\text{D}_8\text{O}$ , 20 °C) of  $[\text{Na}(\text{thf})_6][\{\text{Ti}(\eta^5\text{-C}_5\text{Me}_5)\}_4(\mu_3\text{-N})_4]$  (**5**). \*Unknown species.

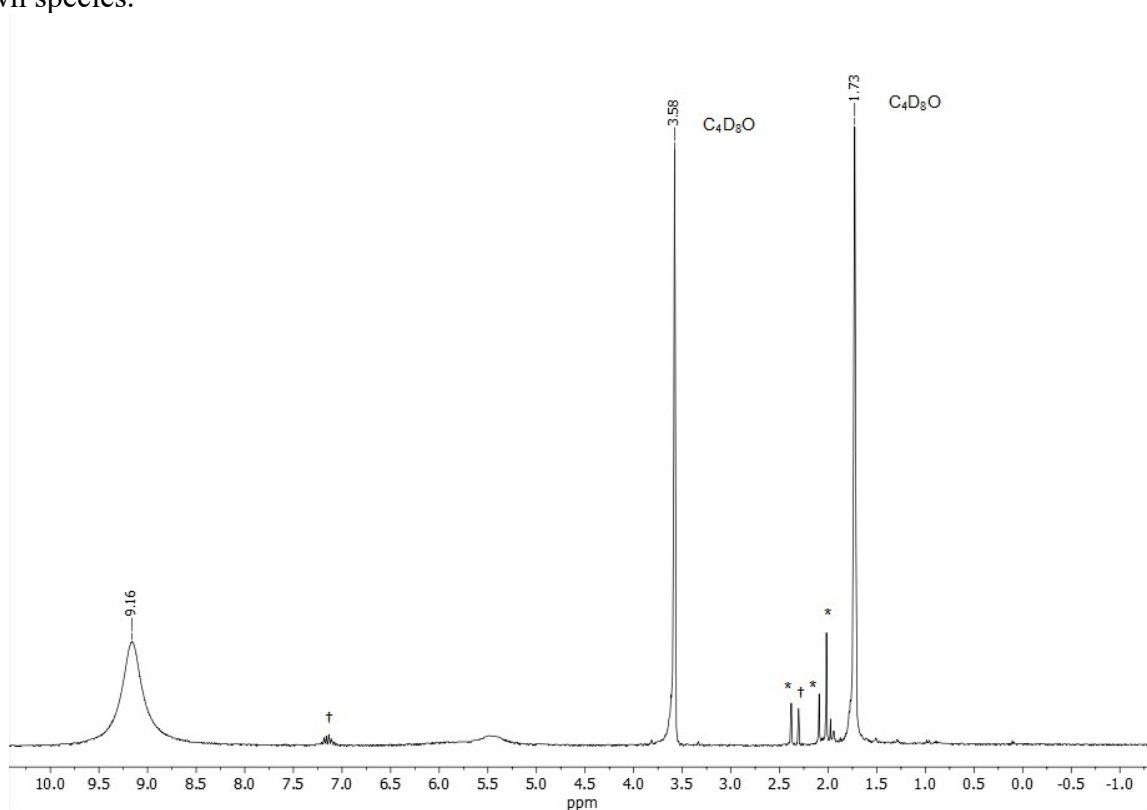

**Figure S12.**  $^1\text{H}$  NMR spectrum (300 MHz,  $\text{C}_4\text{D}_8\text{O}$ , 20 °C) of  $\text{Na}[\{\text{Ti}(\eta^5\text{-C}_5\text{Me}_5)\}_4(\mu_3\text{-N})_4]$ . \*Unknown species. †Toluene.

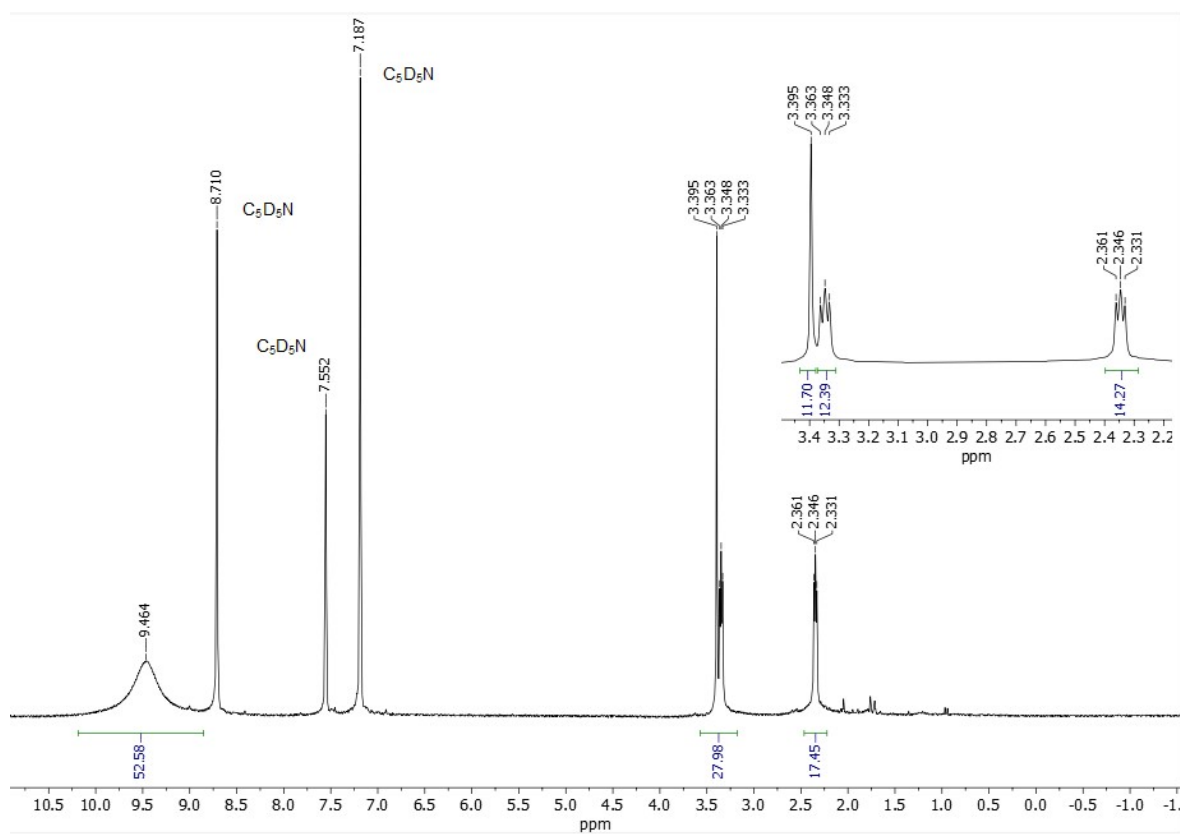

**Figure S13.**  $^1\text{H}$  NMR spectrum (300 MHz,  $\text{C}_5\text{D}_5\text{N}$ , 20 °C) of  $[\text{K}(\text{crypt-222})][\{\text{Ti}(\eta^5\text{-C}_5\text{Me}_5)\}_4(\mu_3\text{-N})_4]$  (7).

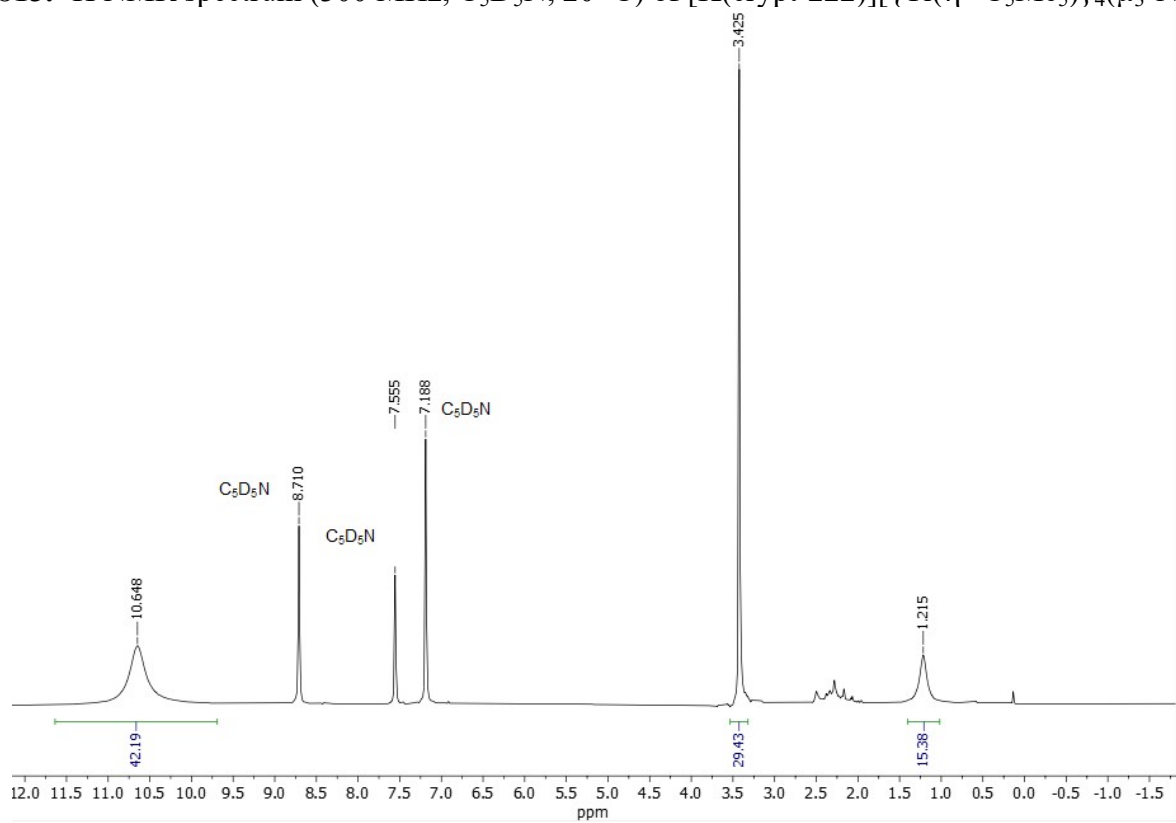

**Figure S14.**  $^1\text{H}$  NMR spectrum (300 MHz,  $\text{C}_5\text{D}_5\text{N}$ , 20 °C) of  $[\text{K}(18\text{-crown-6})][(\text{Ti}_4(\eta^5\text{-C}_5\text{Me}_5)_3\{\text{N}(\text{SiMe}_3)_2\})(\mu_3\text{-N})_4]$  (8).

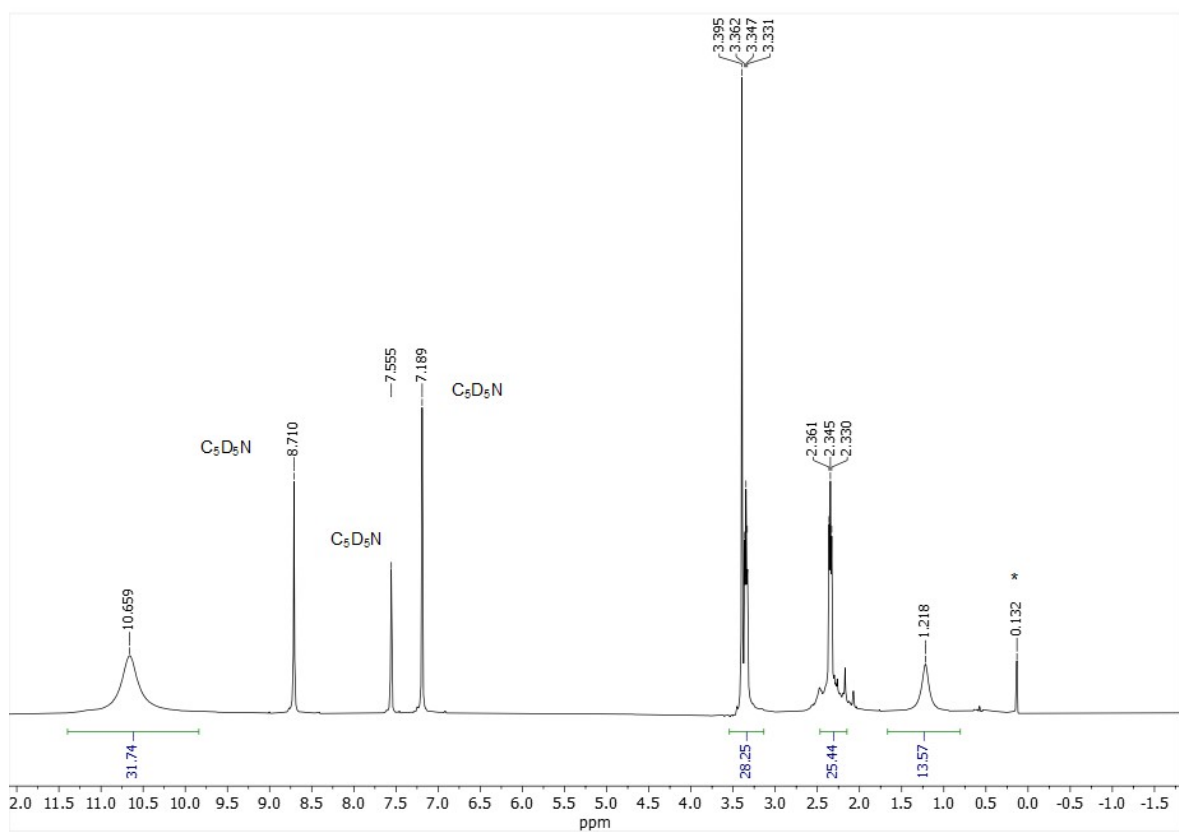

**Figure S15.**  $^1\text{H}$  NMR spectrum (300 MHz,  $\text{C}_5\text{D}_5\text{N}$ , 20 °C) of  $[\text{K}(\text{crypt-222})][(\text{Ti}_4(\eta^5\text{-C}_5\text{Me}_5)_3\{\text{N}(\text{SiMe}_3)_2\})(\mu_3\text{-N})_4]$  (**9**). \*Silicone grease.

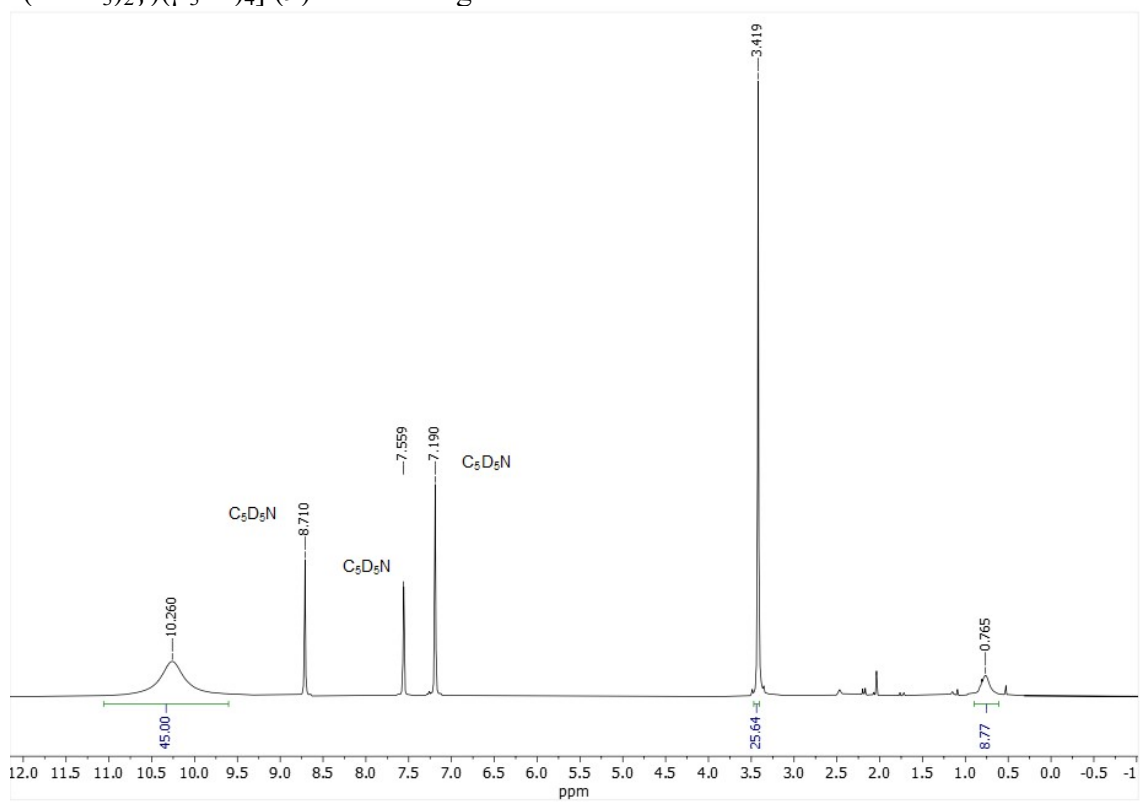

**Figure S16.**  $^1\text{H}$  NMR spectrum (300 MHz,  $\text{C}_5\text{D}_5\text{N}$ , 20 °C) of  $[\text{K}(18\text{-crown-6})][\{\text{Ti}_4(\eta^5\text{-C}_5\text{Me}_5)_3(\eta^5\text{-C}_5\text{H}_4\text{SiMe}_3)\}(\mu_3\text{-N})_4]$  (**10**).

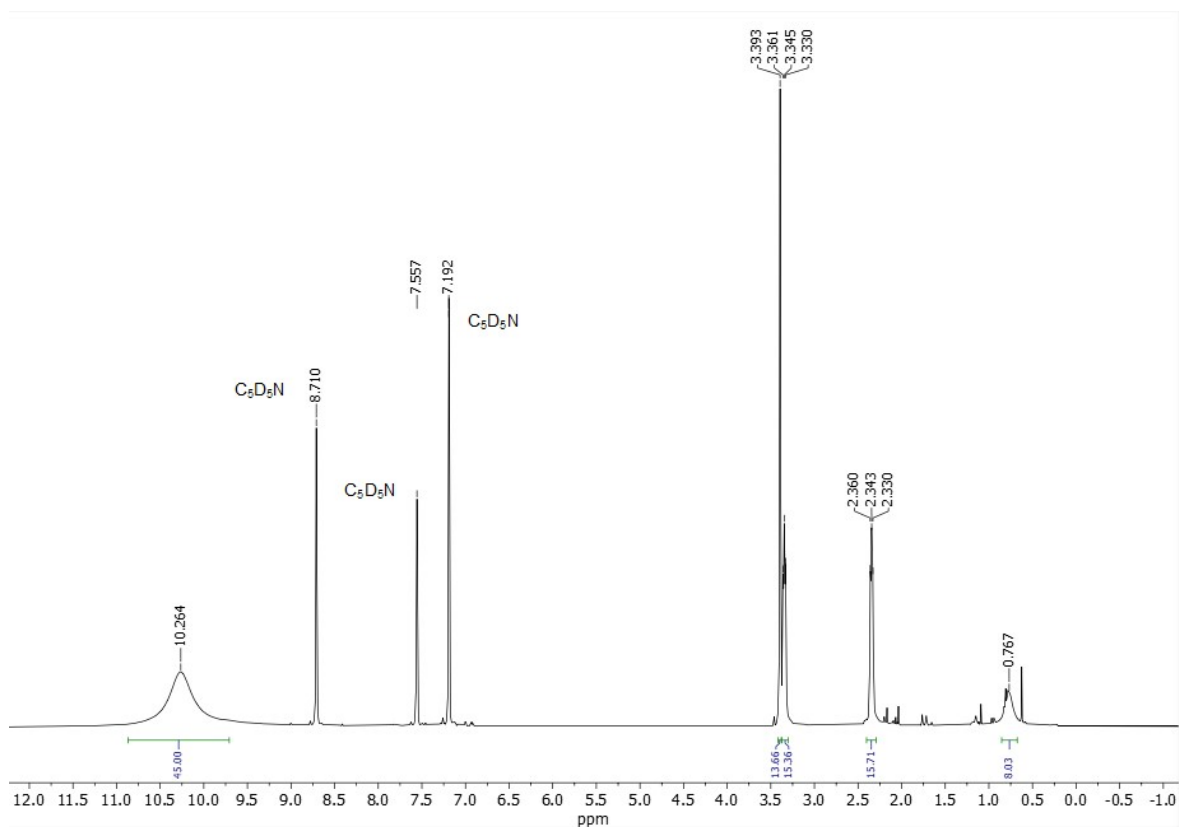

**Figure S17.**  $^1\text{H}$  NMR spectrum (300 MHz,  $\text{C}_5\text{D}_5\text{N}$ , 20 °C) of  $[\text{K}(\text{crypt-222})][\{\text{Ti}_4(\eta^5\text{-C}_5\text{Me}_5)_3(\eta^5\text{-C}_5\text{H}_4\text{SiMe}_3)\}(\mu_3\text{-N})_4]$  (**11**).

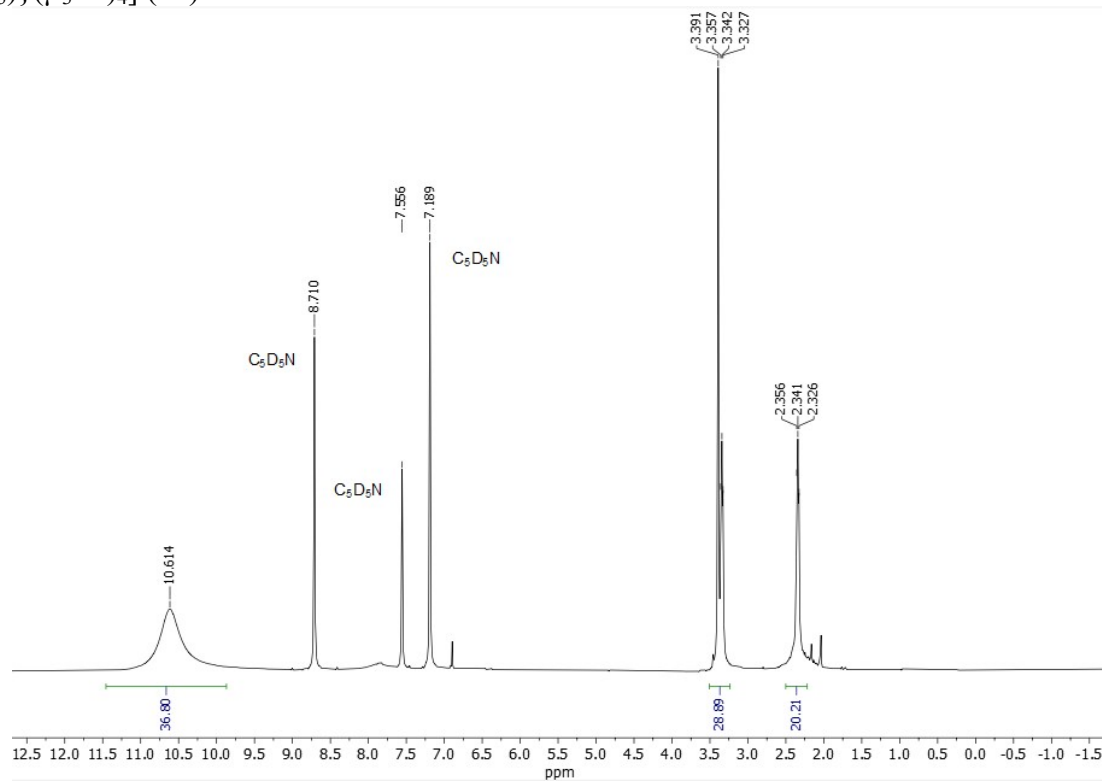

**Figure S18.**  $^1\text{H}$  NMR spectrum (300 MHz,  $\text{C}_5\text{D}_5\text{N}$ , 20 °C) of  $[\text{K}(\text{crypt-222})][\{\text{Ti}_4(\eta^5\text{-C}_5\text{Me}_5)_3(\eta^5\text{-C}_5\text{H}_5)\}(\mu_3\text{-N})_4]$  (**12**).

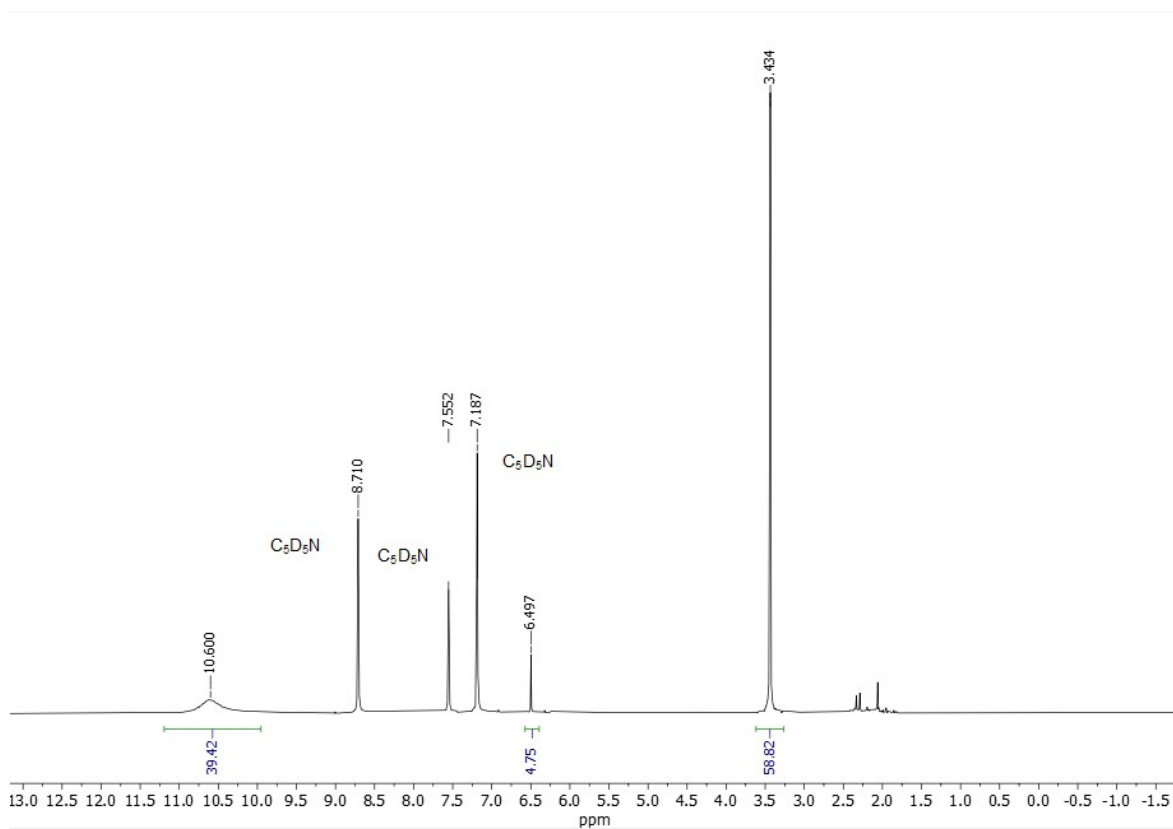

**Figure S19.**  $^1\text{H}$  NMR spectrum (300 MHz,  $\text{C}_5\text{D}_5\text{N}$ , 20 °C) of  $[\{(18\text{-crown-6})\text{K}\}_2(\mu\text{-}\eta^5\text{:}\eta^5\text{-C}_5\text{H}_5)][\{\text{Ti}_4(\eta^5\text{-C}_5\text{Me}_5)_3(\eta^5\text{-C}_5\text{H}_5)\}(\mu_3\text{-N})_4]$  (**13**).

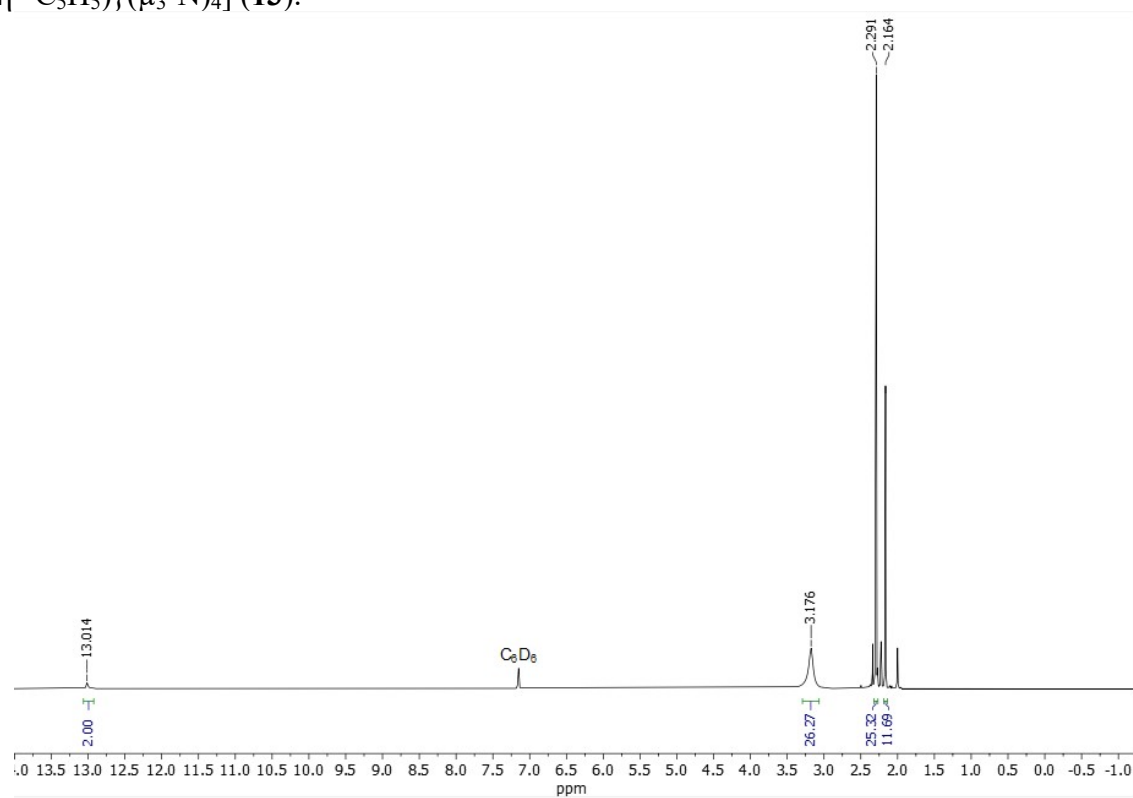

**Figure S20.**  $^1\text{H}$  NMR spectrum (300 MHz,  $\text{C}_6\text{D}_6$ , 20 °C) of  $[(18\text{-crown-6})\text{K}\{(\mu_3\text{-N})(\mu_3\text{-NH})_2\text{Ti}_3(\eta^5\text{-C}_5\text{Me}_5)_3(\mu_3\text{-N})\}]$  (**16**).



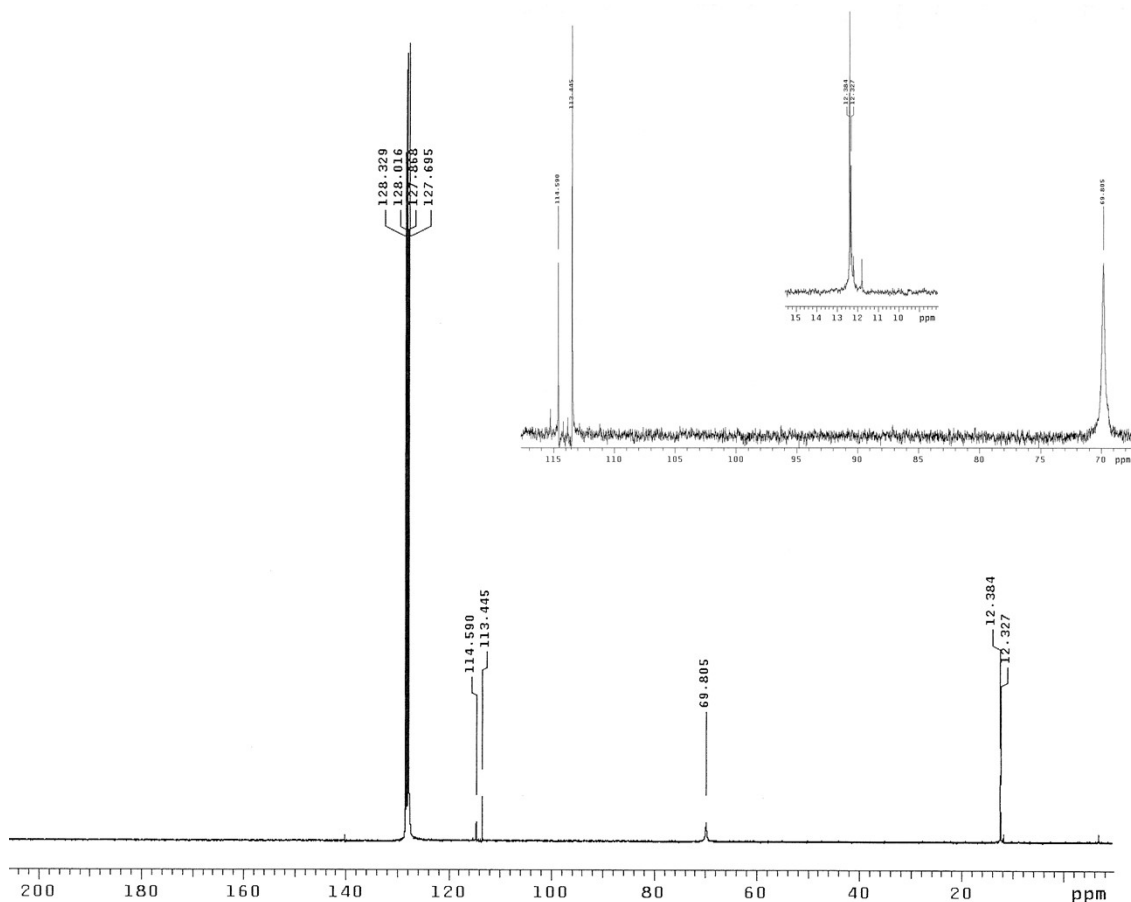

**Figure S21.**  $^{13}\text{C}\{^1\text{H}\}$  NMR spectrum (75 MHz,  $\text{C}_6\text{D}_6$ , 20 °C) of  $[(18\text{-crown-6})\text{K}\{(\mu_3\text{-N})(\mu_3\text{-NH})_2\text{Ti}_3(\eta^5\text{-C}_5\text{Me}_5)_3(\mu_3\text{-N})\}]]$  (16).

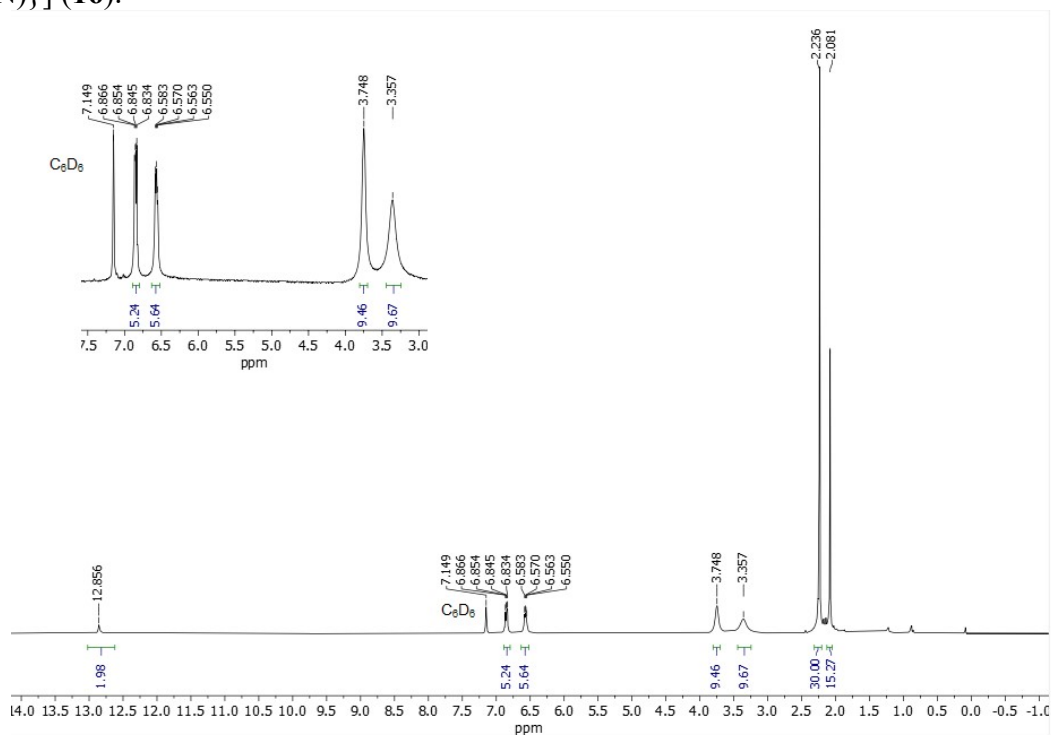

**Figure S22.**  $^1\text{H}$  NMR spectrum (300 MHz,  $\text{C}_6\text{D}_6$ , 20 °C) of  $[(\text{dibenzo-18-crown-6})\text{K}\{(\mu_3\text{-N})(\mu_3\text{-NH})_2\text{Ti}_3(\eta^5\text{-C}_5\text{Me}_5)_3(\mu_3\text{-N})\}]]$  (17).

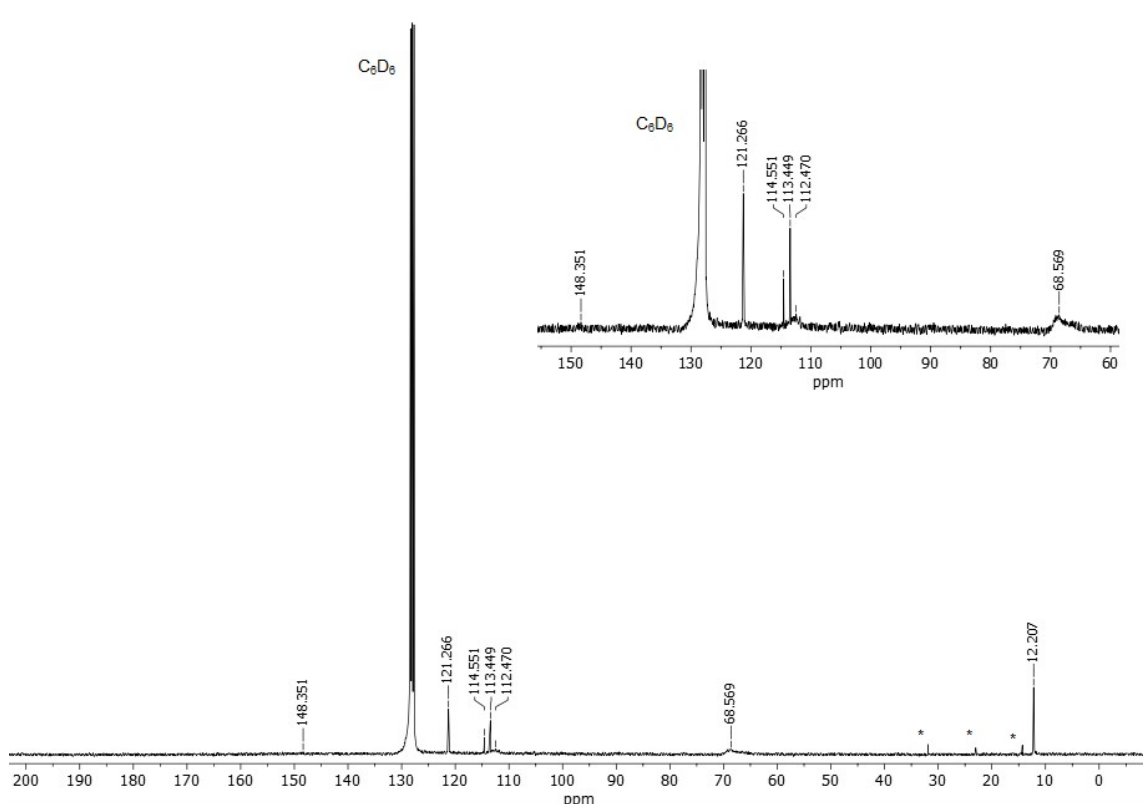

**Figure S23.**  $^{13}\text{C}\{^1\text{H}\}$  NMR spectrum (75 MHz,  $\text{C}_6\text{D}_6$ , 20 °C) of  $[(\text{dibenzo-18-crown-6})\text{K}\{(\mu_3\text{-N})(\mu_3\text{-NH})_2\text{Ti}_3(\eta^5\text{-C}_5\text{Me}_5)_3(\mu_3\text{-N})\}]]$  (**17**). \**n*-hexane.

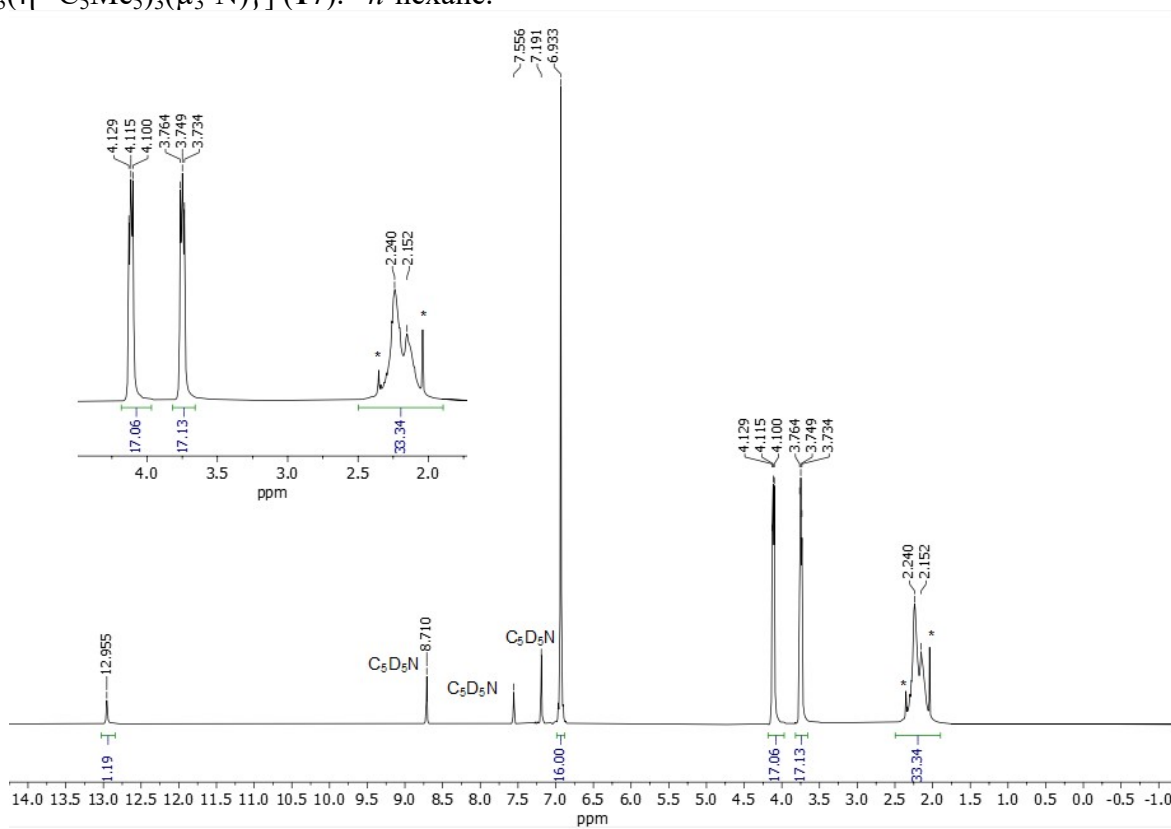

**Figure S24.**  $^1\text{H}$  NMR spectrum (300 MHz,  $\text{C}_5\text{D}_5\text{N}$ , 20 °C) of  $[\text{K}(\text{dibenzo-18-crown-6})_2][\text{Ti}_3(\eta^5\text{-C}_5\text{Me}_5)_3(\mu_3\text{-N})(\mu\text{-N})(\mu\text{-NH})_2]]$  (**18**). \*Unknown species.

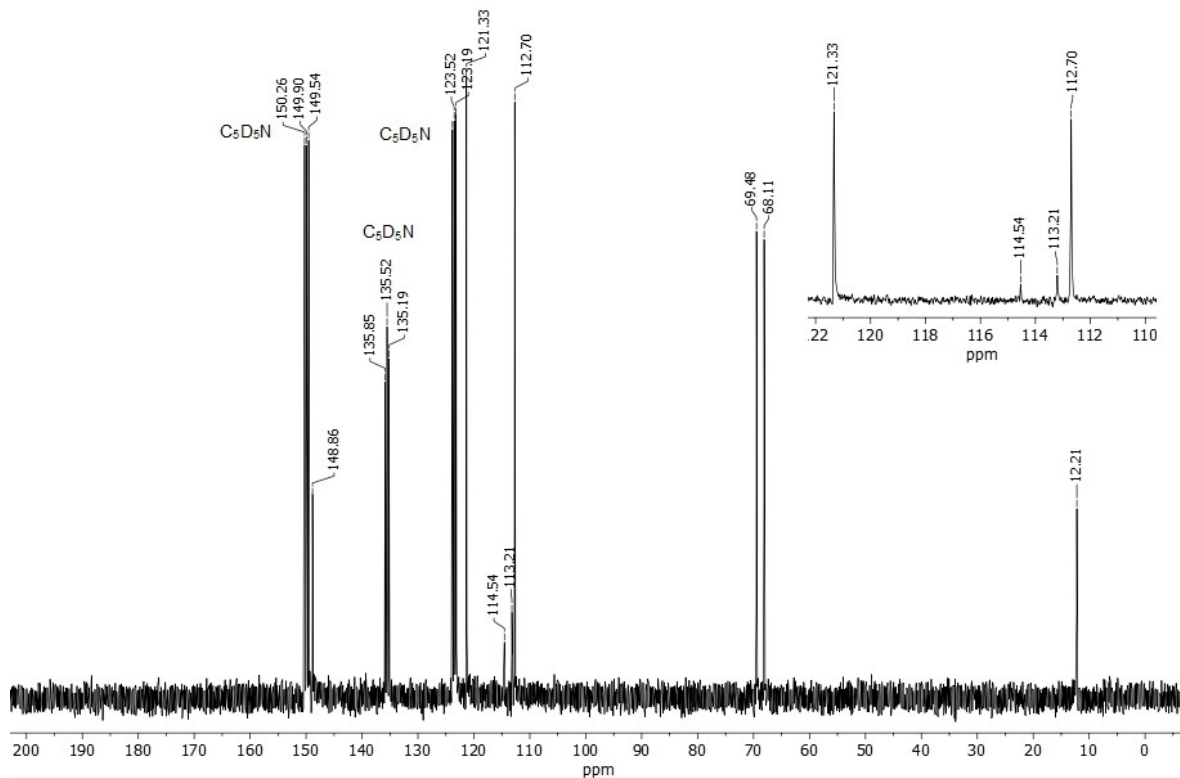

**Figure S25.**  $^{13}\text{C}\{^1\text{H}\}$  NMR spectrum (75 MHz,  $\text{C}_5\text{D}_5\text{N}$ , 20 °C) of  $[\text{K}(\text{dibenzo-18-crown-6})_2][\text{Ti}_3(\eta^5\text{-C}_5\text{Me}_5)_3(\mu_3\text{-N})(\mu\text{-N})(\mu\text{-NH}_2)]$  (18).

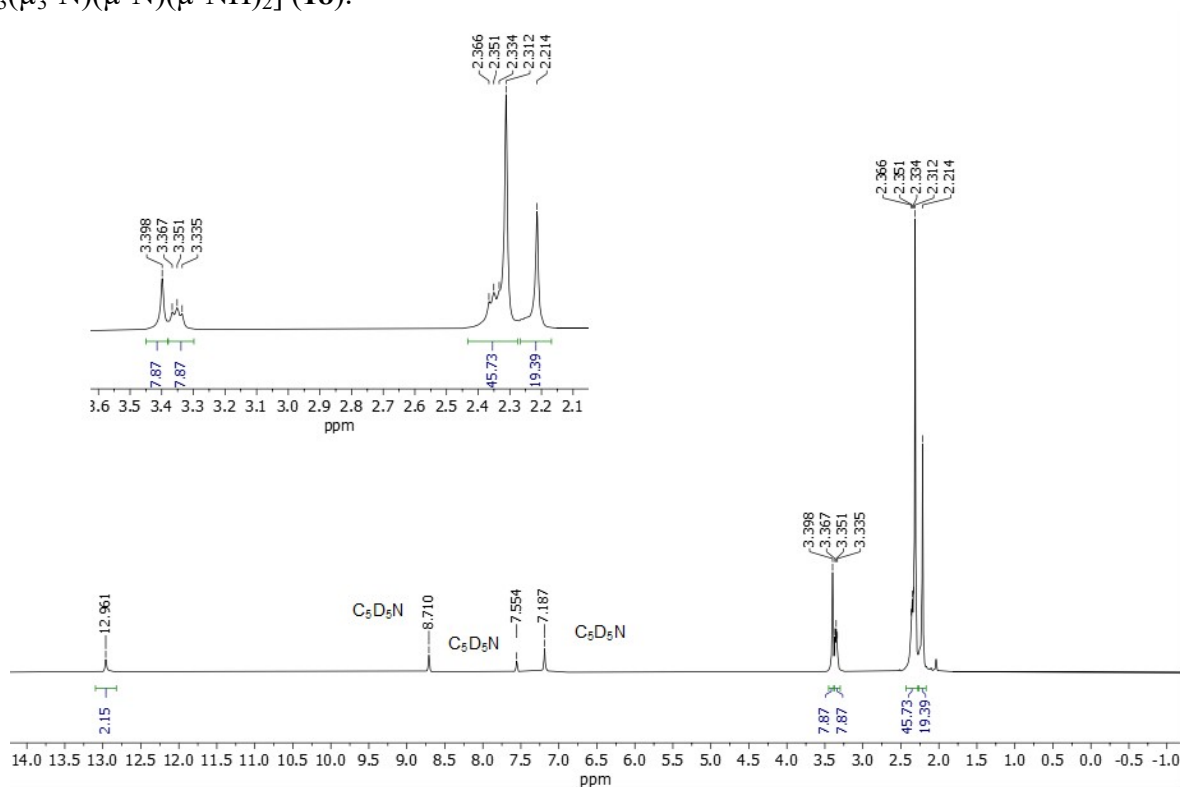

**Figure S26.**  $^1\text{H}$  NMR spectrum (300 MHz,  $\text{C}_5\text{D}_5\text{N}$ , 20 °C) of  $[\text{K}(\text{crypt-222})][\text{Ti}_3(\eta^5\text{-C}_5\text{Me}_5)_3(\mu_3\text{-N})(\mu\text{-N})(\mu\text{-NH}_2)]$  (19).

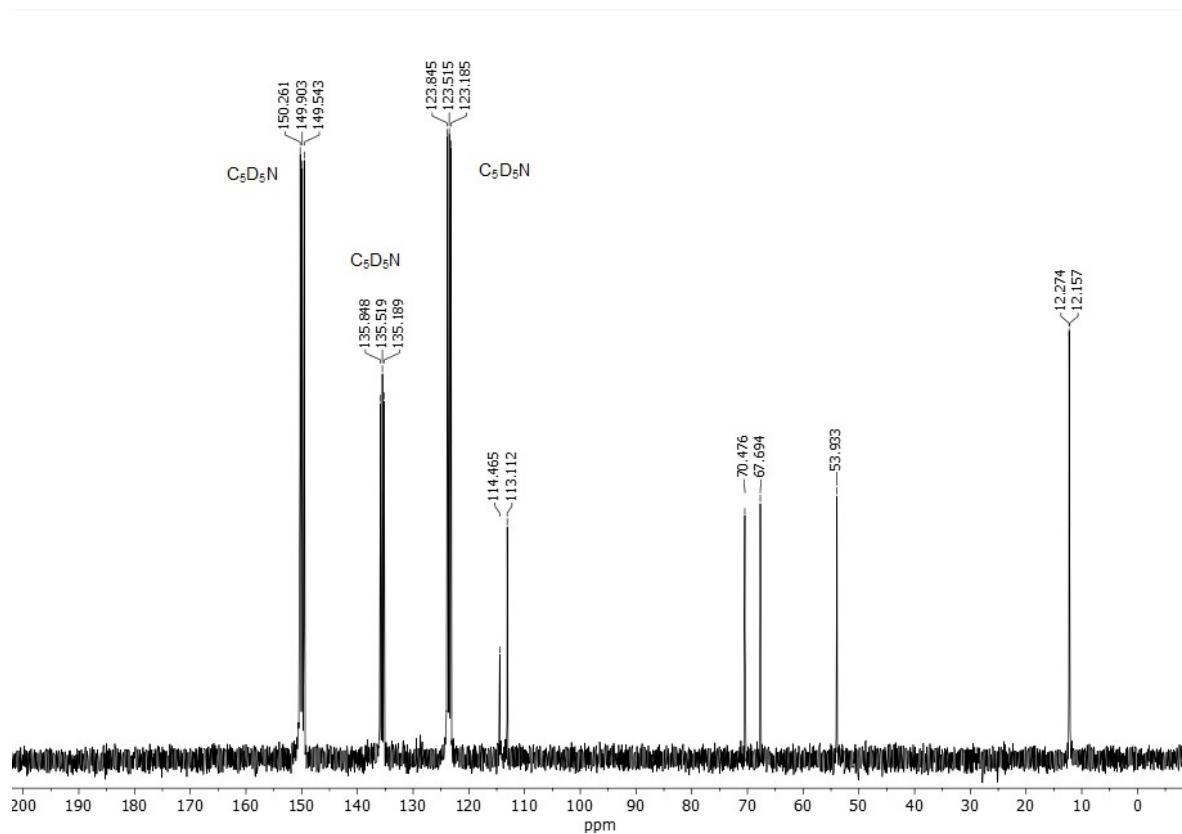

**Figure S27.**  $^{13}\text{C}\{^1\text{H}\}$  NMR spectrum (75 MHz,  $\text{C}_5\text{D}_5\text{N}$ , 20 °C) of  $[\text{K}(\text{crypt-222})][\text{Ti}_3(\eta^5\text{-C}_5\text{Me}_5)_3(\mu_3\text{-N})(\mu\text{-N})(\mu\text{-NH}_2)]$  (19).
